# Supplementary material for: Effects of alkyl chain length on the cold crystallization of Schiff-base nickel(ii) complexes
Source: Royal Society of Chemistry journal article supplement (doi:10.1039/d2ce00305h), 2022-01-01
Supplement: d2ce00305h1.pdf [file d2ce00305h1.pdf]

## **Supplementary information**

### **Effects of Alkyl Chain Length on the Cold Crystallization of Schiff-Base Nickel(II) Complexes**

Toru Ishikawa,\* Akinori Honda and Kazuo Miyamura\*

Department of Chemistry, Faculty of Science, Tokyo University of Science, 1-3 Kagurazaka, Shinjuku-ku, Tokyo  
162-8601, Japan.

E-mail: 1319701@ed.tus.ac.jp (T. Ishikawa), miyamura@rs.kagu.tus.ac.jp (K. Miyamura)

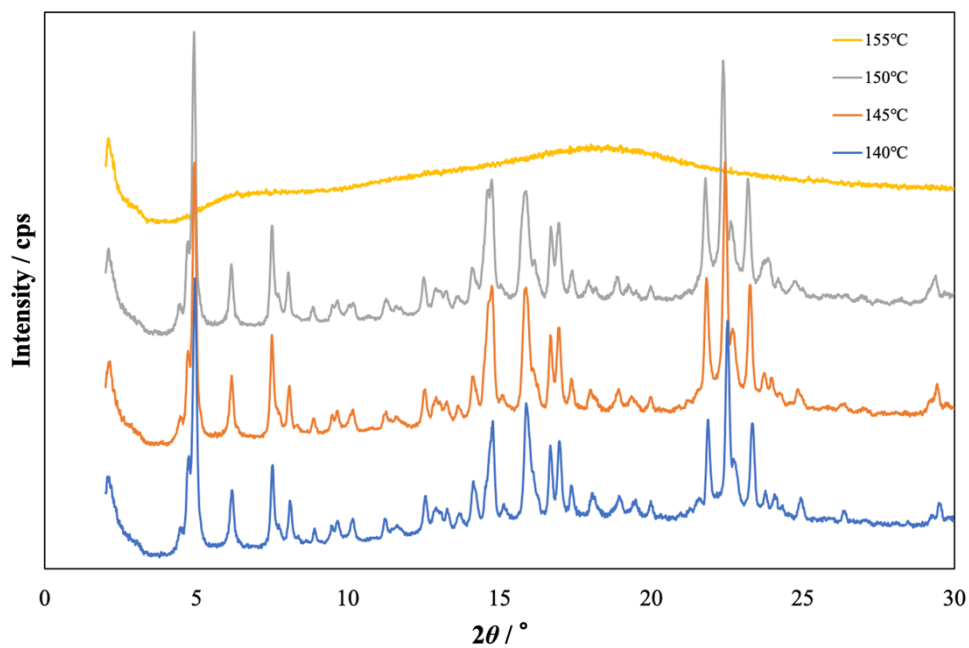

Fig. S1 X-ray diffraction patterns of OC6-salmpn at around 140-155°C after cold crystallization.

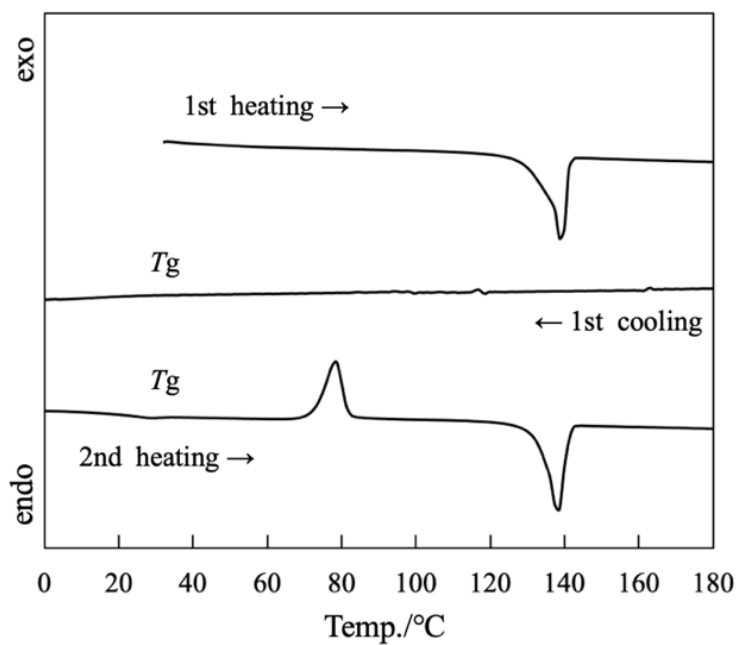

Fig. S2 DSC diagrams of OC8-salmpn. Heating and cooling rate: 5°C/min.

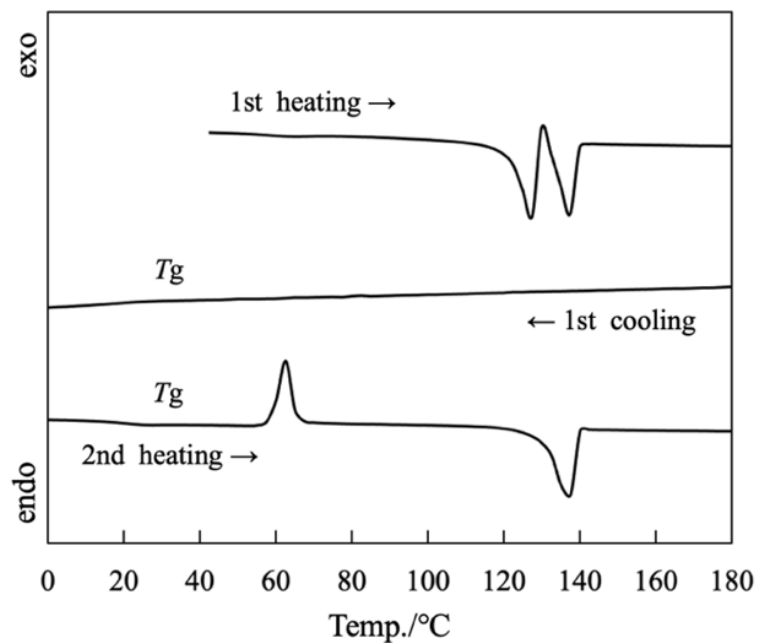

**Fig. S3** DSC diagrams of OC10-salmpn. Heating and cooling rate: 5°C/min.

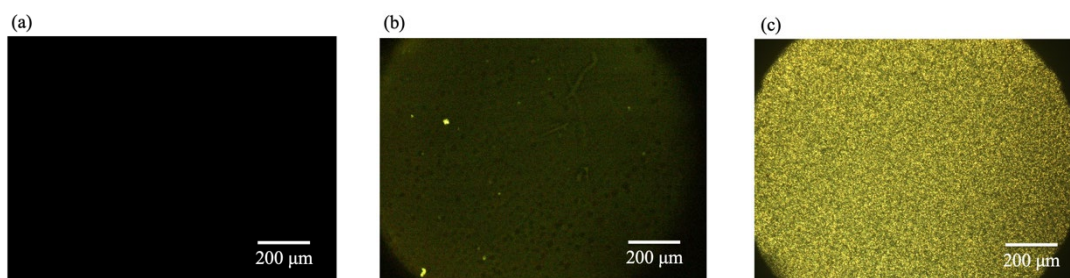

**Fig. S4** Optical microscopic images of OC8-salmpn (a) melted isotropic liquid state at 170°C on 1st heating, and (b) isotropic supercooled liquid state under  $T_g$ , and (c) cold crystallized state at 100 °C on 2nd heating.

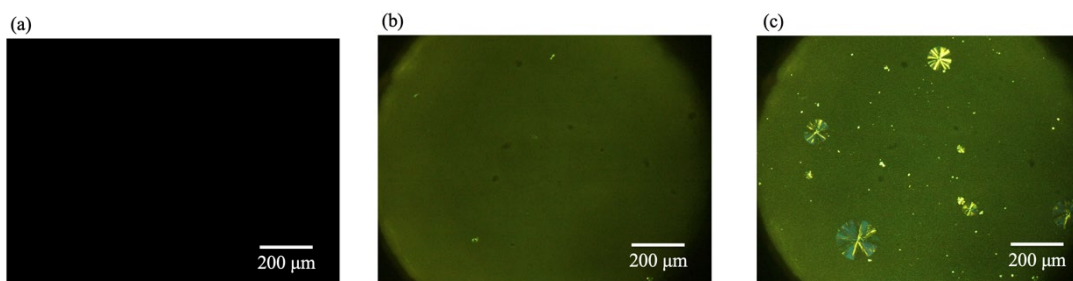

**Fig. S5** Optical microscopic images of OC10-salmpn (a) melted isotropic liquid state at 170°C on 1st heating, and (b) isotropic supercooled liquid state under  $T_g$ , and (c) cold crystallized state at 100 °C on 2nd heating.

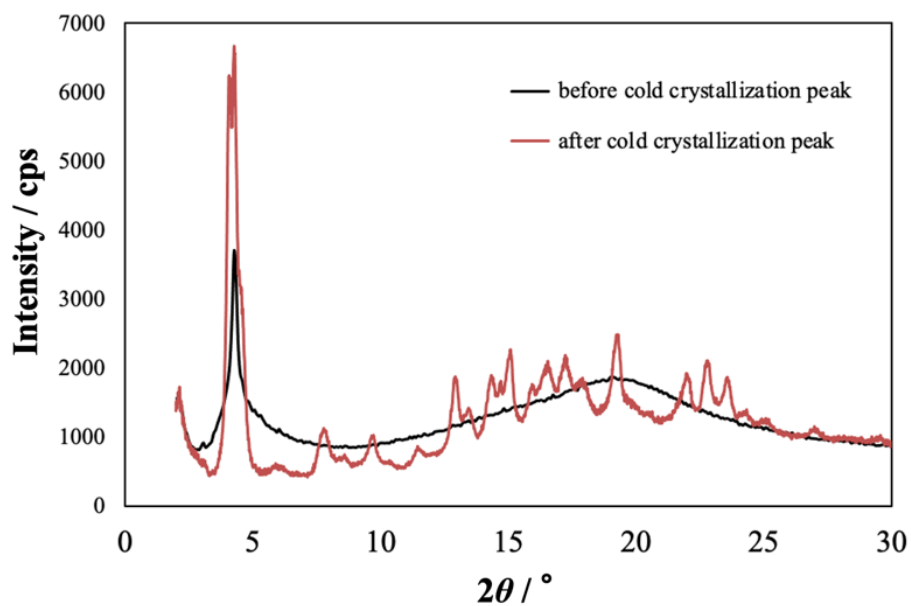

**Fig. S6** X-ray diffraction patterns of OC8-salmpn. Black line: at 25 °C on heating (before cold crystallization peak). Red line: once heated to 100°C (after cold crystallization peak).

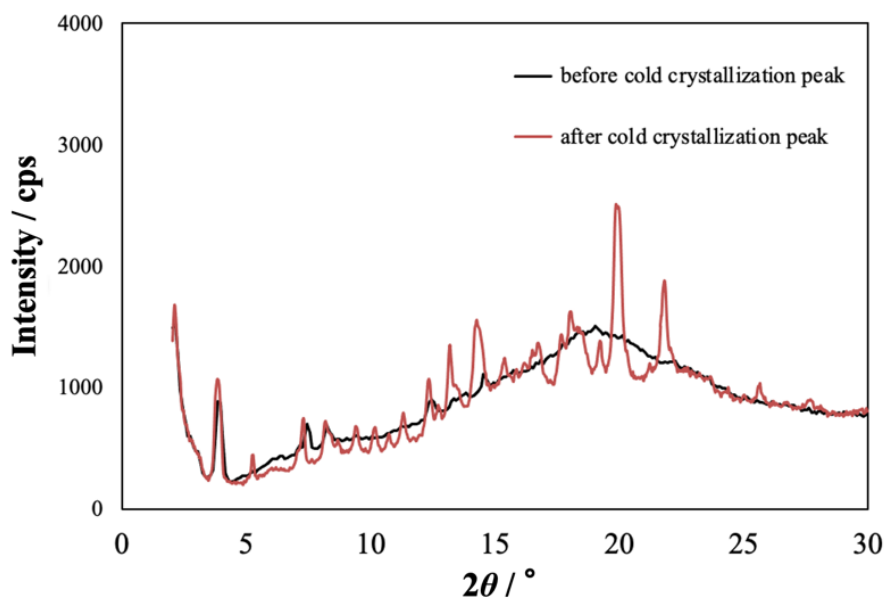

**Fig. S7** X-ray diffraction patterns of OC10-salmpn. Black line: at 25 °C on heating (before cold crystallization peak). Red line: once heated to 80°C (after cold crystallization peak).

**Table S1** Phase transition temperature and phase transition enthalpy of OC $n$ -salmpn ( $n = 6,8,10$ ).

| $n$ | 1st heating |                       |            |                       | 1st cooling |            | 2nd heating |                       |            |                       |
|-----|-------------|-----------------------|------------|-----------------------|-------------|------------|-------------|-----------------------|------------|-----------------------|
|     | $T_m$ (°C)  | $\Delta H_m$ (kJ/mol) | $T_m$ (°C) | $\Delta H_m$ (kJ/mol) | $T_g$ (°C)  | $T_g$ (°C) | $T_c$ (°C)  | $\Delta H_c$ (kJ/mol) | $T_m$ (°C) | $\Delta H_m$ (kJ/mol) |
| 6   | 150.9       | 24.4                  |            |                       | 43.1        | 37.2       | 102.1       | 17.0                  | 151.4      | 22.7                  |
| 8   | 135.3       | 22.4                  |            |                       | 29.9        | 30.5       | 72.5        | 14.4                  | 134.0      | 21.2                  |
| 10  | 122.2       | 19.3                  | 134.3      | 14.0                  | 19.1        | 15.4       | 58.8        | 12.8                  | 132.1      | 20.3                  |

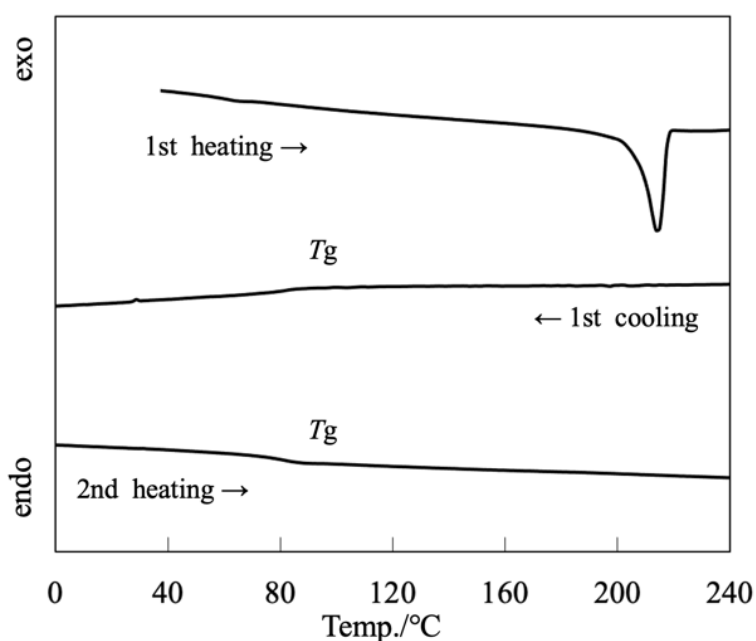

**Fig. S8** DSC diagrams of OC2-salmpn. Heating and cooling rate: 5°C/min.

**Table S2** Phase transition temperature and phase transition enthalpy of OC $n$ -salmpn ( $n = 2,4$ ).

| $n$ | 1st heating |                       | 1st cooling | 2nd cooling |
|-----|-------------|-----------------------|-------------|-------------|
|     | $T_m$ (°C)  | $\Delta H_m$ (kJ/mol) | $T_g$ (°C)  | $T_g$ (°C)  |
| 2   | 207.9       | 18.6                  | 85.9        | 73.3        |
| 4   | 94.9        | 42.2                  | 49.6        | 44.9        |

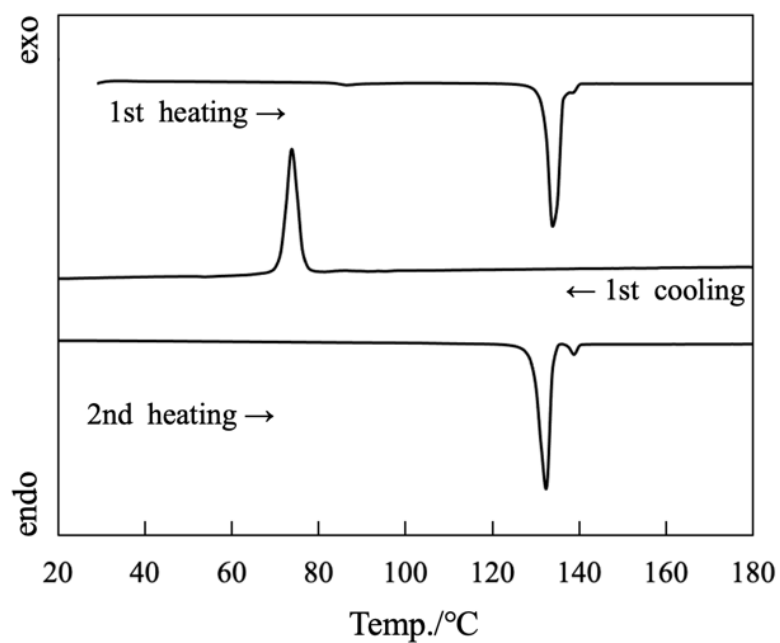

Fig. S9 DSC diagrams of OC12-salmpn. Heating and cooling rate: 5°C/min.

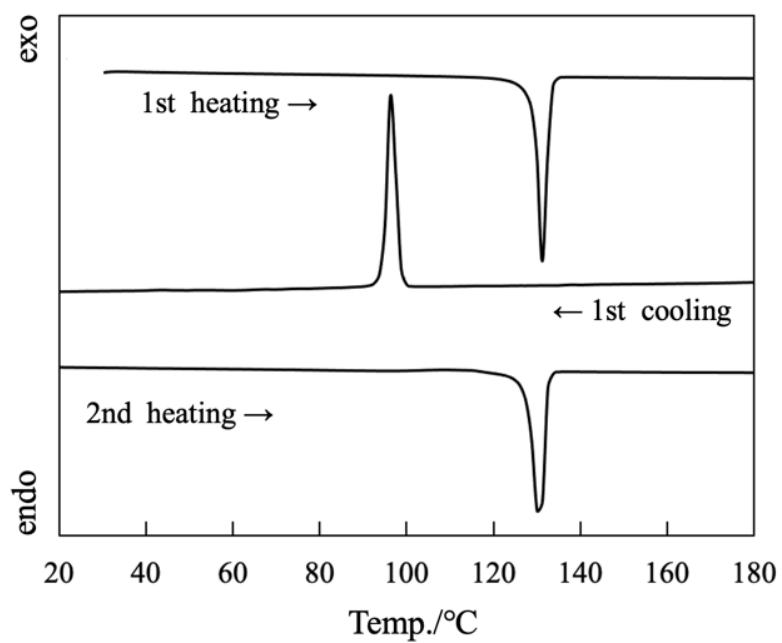

Fig. S10 DSC diagrams of OC16-salmpn. Heating and cooling rate: 5°C/min.

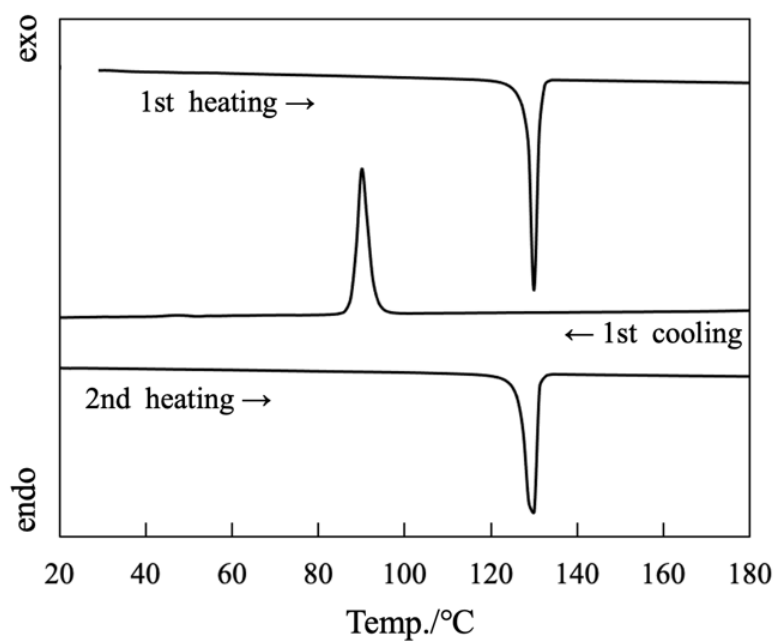

Fig. S11 DSC diagrams of OC18-salmpn. Heating and cooling rate: 5°C/min.

Table S3 Phase transition temperature and phase transition enthalpy of OC $n$ -salmpn ( $n = 12, 14, 16, 18$ ).

| $n$ | 1st heating |                       | 1st cooling |                       | 2nd heating |                       |            |                       |
|-----|-------------|-----------------------|-------------|-----------------------|-------------|-----------------------|------------|-----------------------|
|     | $T_m$ (°C)  | $\Delta H_m$ (kJ/mol) | $T_c$ (°C)  | $\Delta H_c$ (kJ/mol) | $T_m$ (°C)  | $\Delta H_m$ (kJ/mol) | $T_m$ (°C) | $\Delta H_m$ (kJ/mol) |
| 12  | 131.9       | 48.2                  | 76.3        | 42.1                  | 129.4       | 44.3                  | 137.3      | 1.7                   |
| 14  | 129.6       | 46.8                  | 83.6        | 42.0                  | 129.6       | 41.5                  | 133.8      | 0.9                   |
| 16  | 128.4       | 58.9                  | 92.9        | 56.4                  | 126.7       | 57.5                  |            |                       |
| 18  | 129.4       | 65.4                  | 98.4        | 63.1                  | 127.8       | 67.1                  |            |                       |

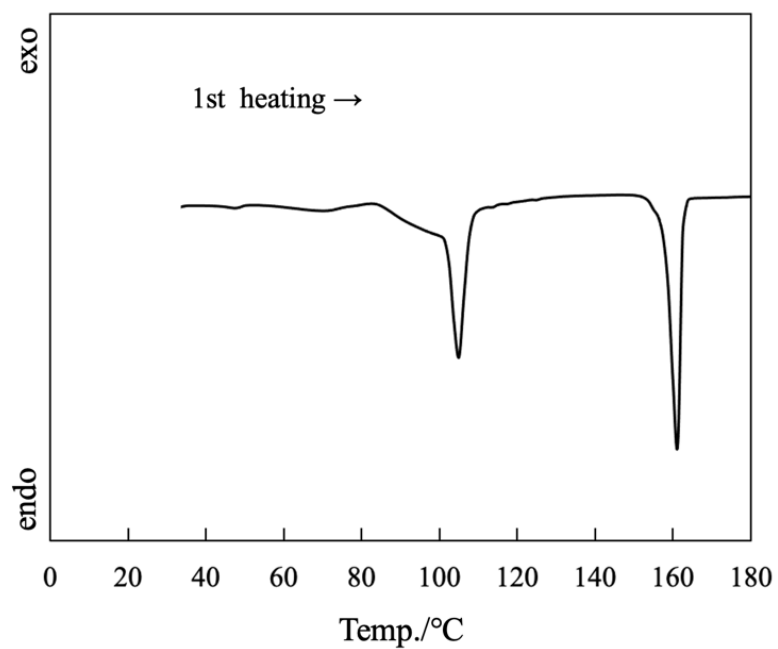

**Fig. S12a** DSC diagrams of OC6-salmpn · CHCl<sub>3</sub> on 1st heating. Heating rate: 5°C/min.

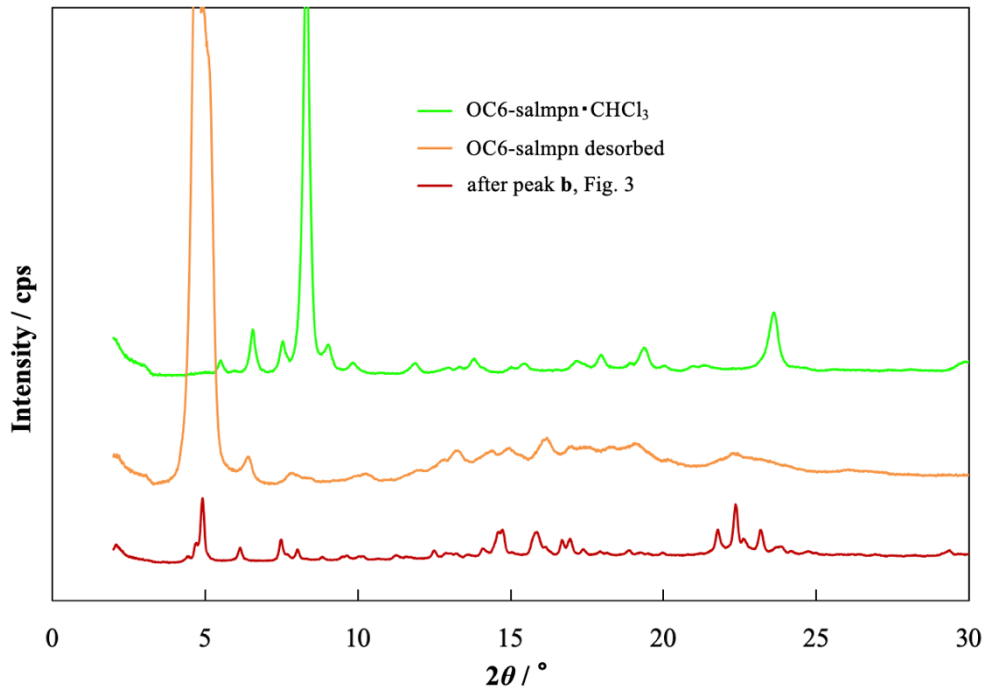

**Fig. S12b** X-ray diffraction patterns of simulated single crystal structure, OC6-salmpn · CHCl<sub>3</sub>, and OC6-salmpn desorption and the pattern in Fig. 5 (red curve).



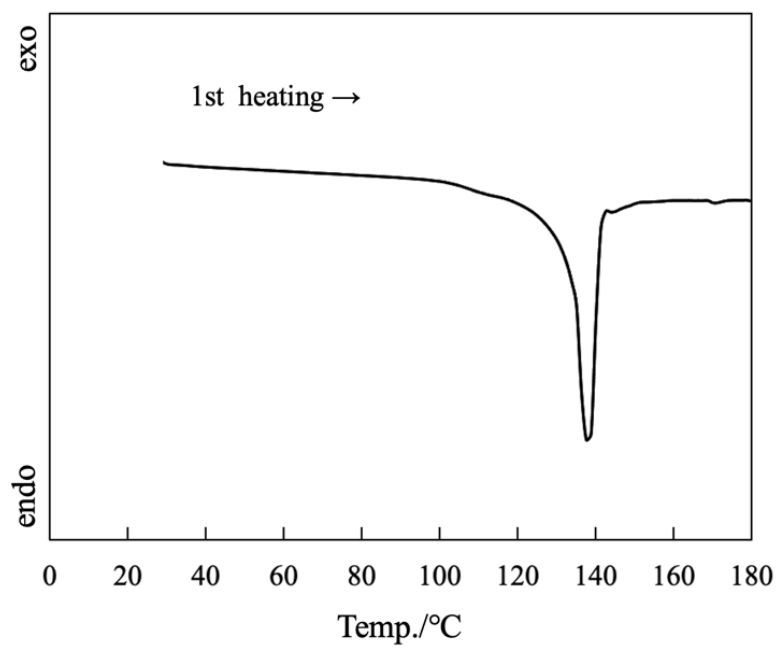

**Figure S13** DSC diagrams of OC4-salmpn · CHCl<sub>3</sub> on 1st heating. Heating rate: 5 °C/min.
